# Supplementary material
Source: publisher figshare collection journal article supplement (https://karger.figshare.com/ndownloader/files/27059963)
Supplement: Supplementary file 1 [file 27059963]

| **Supplementary table 1.** Carotid artery endothelial SIG in stroke patients and controls | | | |
| --- | --- | --- | --- |
| Variables | Controls | Patients | P value* |
| Carotid artery endothelial SIG, SI/mm |  |  |  |
| Right CCA |  |  |  |
| Right ischemic stroke of LAA | 3.2 ± 0.9 | 2.8 ± 0.7 | 0.002 |
| Left ischemic stroke of LAA | 3.2 ± 0.6 | 0.256 |
| Right ICA |  |  |  |
| Right ischemic stroke of LAA | 3.5 ± 0.9 | 3.0 ± 0.8 | 0.003 |
| Left ischemic stroke of LAA | 3.3 ± 0.6 | 0.160 |
| Left CCA |  |  |  |
| Right ischemic stroke of LAA | 3.1 ± 0.8 | 3.0 ± 0.6 | 0.152 |
| Left ischemic stroke of LAA | 2.9 ± 0.6 | 0.014 |
| Left ICA |  |  |  |
| Right ischemic stroke of LAA | 3.4 ± 1.0 | 3.3 ± 0.8 | 0.111 |
| Left ischemic stroke of LAA | 2.8 ± 0.7 | 0.001 |

Values represented as mean ± standard deviation (SD). SIG: signal intensity gradient, CCA: common carotid artery, ICA: internal carotid artery, LAA: large artery atherosclerosis.

* P values as determined by independent t-test.
